# Supplementary material for: Alternative motif toward high-quality wurtzite MnSe nanorods via subtle sulfur element doping
Source: Royal Society of Chemistry journal article supplement (doi:10.1039/c6nr00446f), 2016-01-01
Supplement: c6nr00446f1.pdf [file c6nr00446f1.pdf]

**Supplementary Information for:**  
**Alternative motif toward high-quality wurtzite MnSe**  
**nanorods via subtle sulfur element doping**

*Bo Zhou,<sup>‡</sup> <sup>a</sup> Xinyi Yang,<sup>‡\*</sup> <sup>a</sup> Yongming Sui,<sup>a</sup> Guanjun Xiao,<sup>a</sup> Yingjin Wei,<sup>b</sup> and Bo Zou<sup>\*, a</sup>*

<sup>a</sup> *State key Laboratory of Superhard Materials, Jilin University, Changchun, 130012, China.*

*E-mail: zoubo@jlu.edu.cn; yxy10@mails.jlu.edu.cn*

<sup>b</sup> *Key Laboratory of Physics and Technology for Advanced Batteries (Ministry of Education), College of Physics, Jilin University, Changchun, 130012, China*

**Table S1.** Summary of the reaction conditions for corresponding S dopant content and crystal structure in MnSe NCs.

| Samples | 0.5 M OLA-S Precursor/mL | S-dopant molar content/% | T/°C | t/min | Crystal structure |
|---------|--------------------------|--------------------------|------|-------|-------------------|
| S1      | 0.1                      | 0.81                     | 300  | 20    | WZ                |
| S2      | 0.4                      | 3.88                     | 300  | 20    | WZ                |
| S3      | 0.7                      | 5.92                     | 300  | 20    | WZ                |
| S4      | 1.0                      | 8.91                     | 300  | 20    | WZ                |

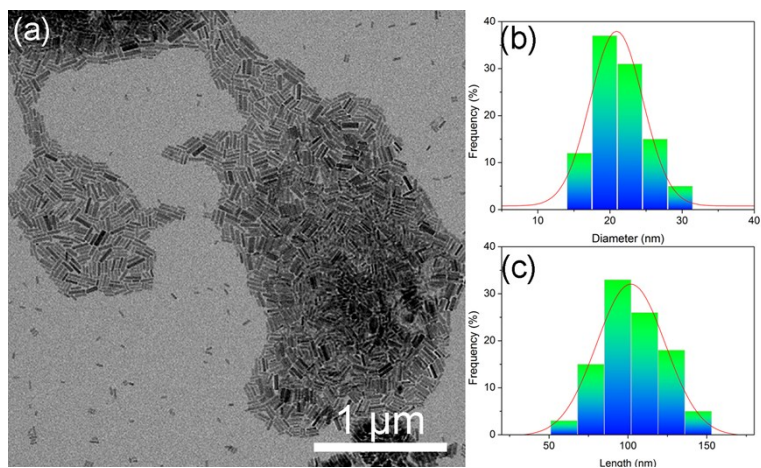

**Fig. S1** (a) Typical low-magnification TEM image of the as-prepared WZ-type MnSe nanorods with ~6% S dopant. (b) Diameter and (c) length histograms of the nanorods.

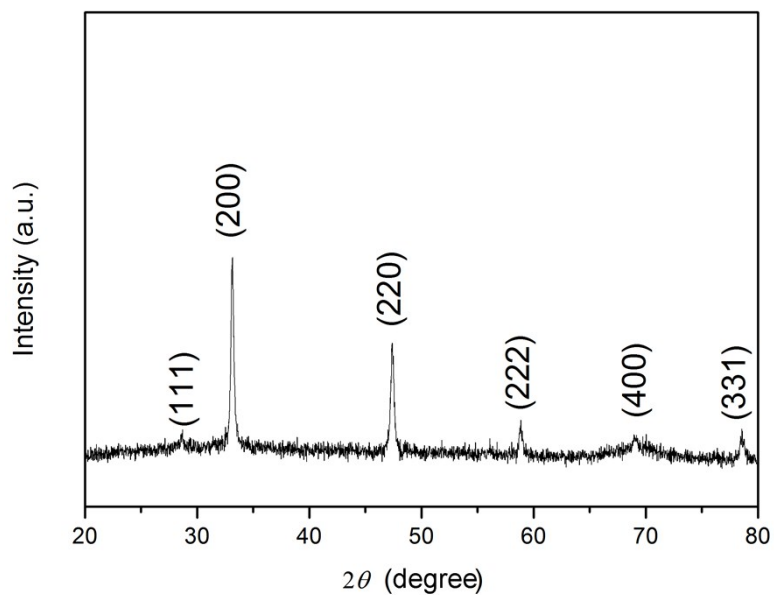

**Fig. S2** Typical XRD pattern of the as-obtained RS-type MnSe nanoparticles, which was collected on a Shimadzu XRD-6000 diffractometer working with a Cu-Kα target.

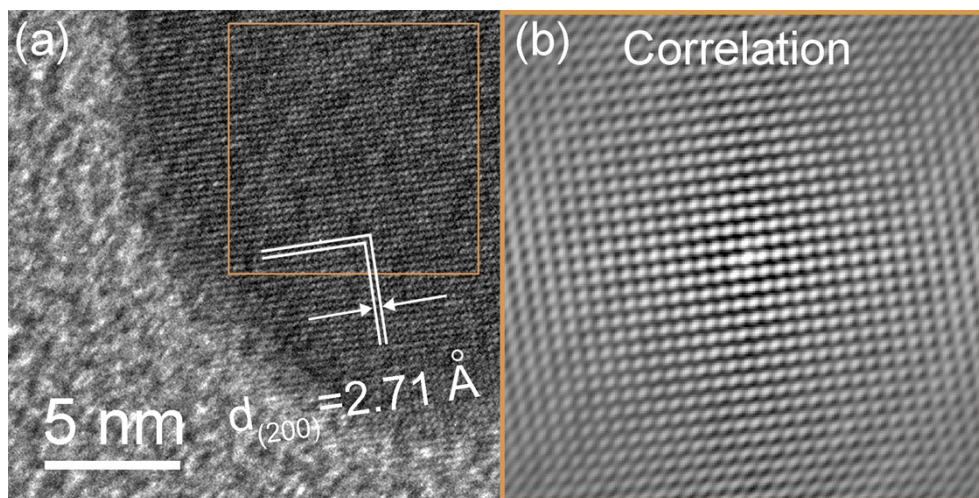

**Fig. S3** (a) Representative HRTEM image of the as-obtained RS-type MnSe nanoparticles. (b) The corresponding selected area correlation pattern.

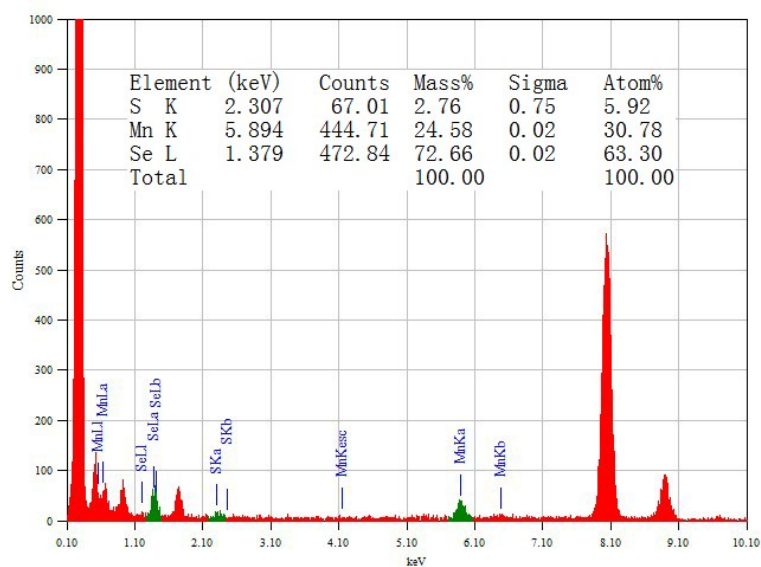

**Fig. S4** EDX spectrum of the as-prepared ~6% S dopant WZ-MnSe nanorods.

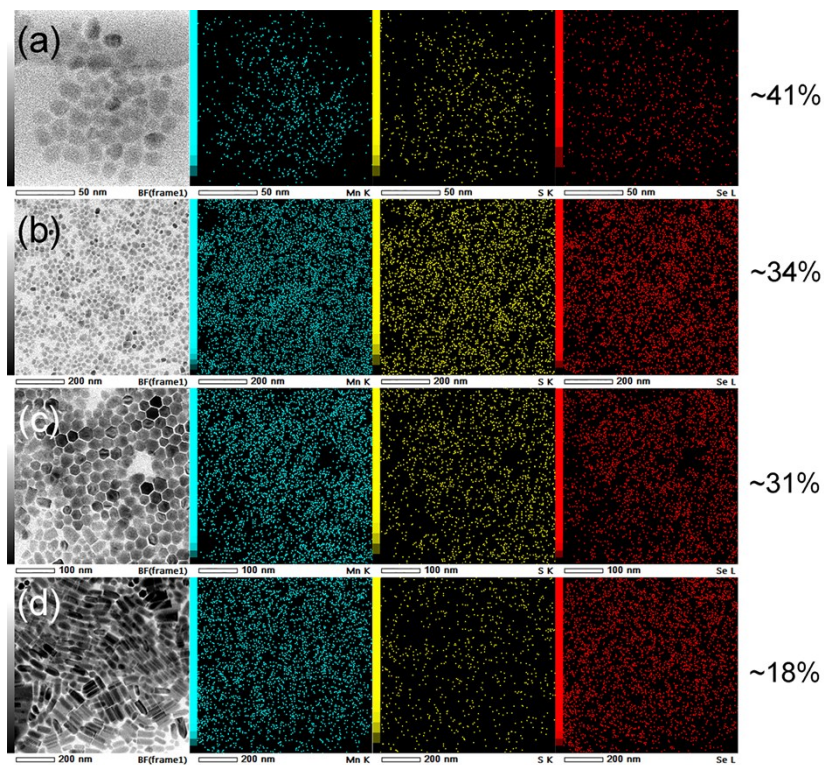

**Fig. S5** STEM-bright field and element mapping (Mn, S and Se) images of the sample obtained at different reaction intervals: (a) 2, (b) 3, (c) 5, and (d) 8 min.

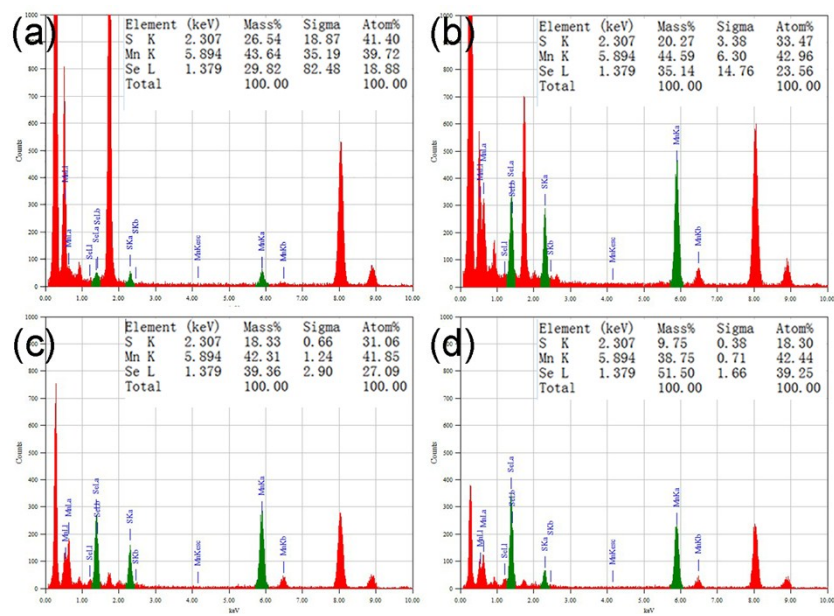

**Fig. S6** EDX spectra of the sample obtained at different reaction intervals: (a) 2, (b) 3, (c) 5, and (d) 8 min.



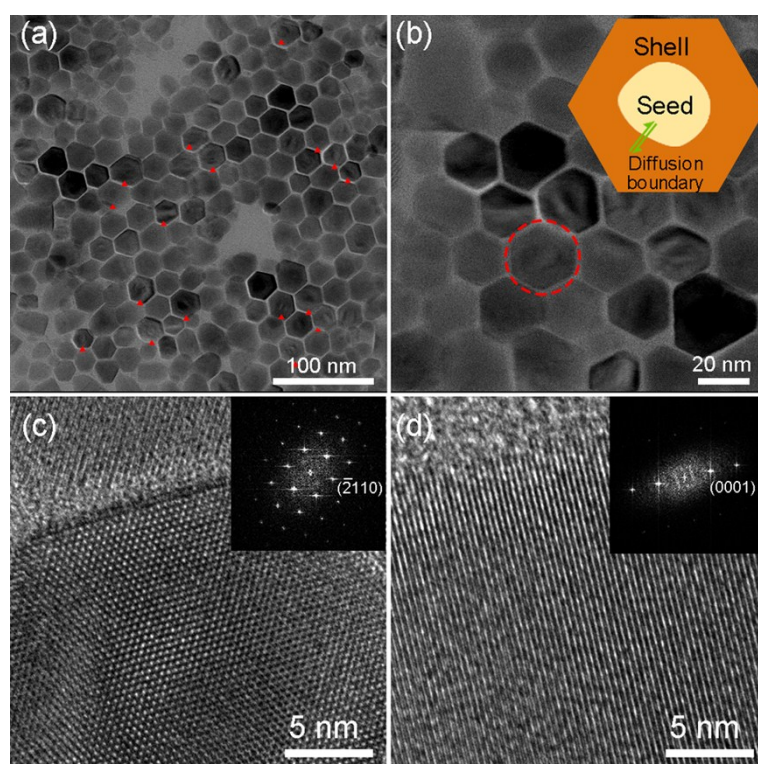

**Fig. S7** (a, b) TEM and (c, d) HRTEM images of the sample obtained during reaction. Inset in (b) shows schematic illustration of the nanorod.

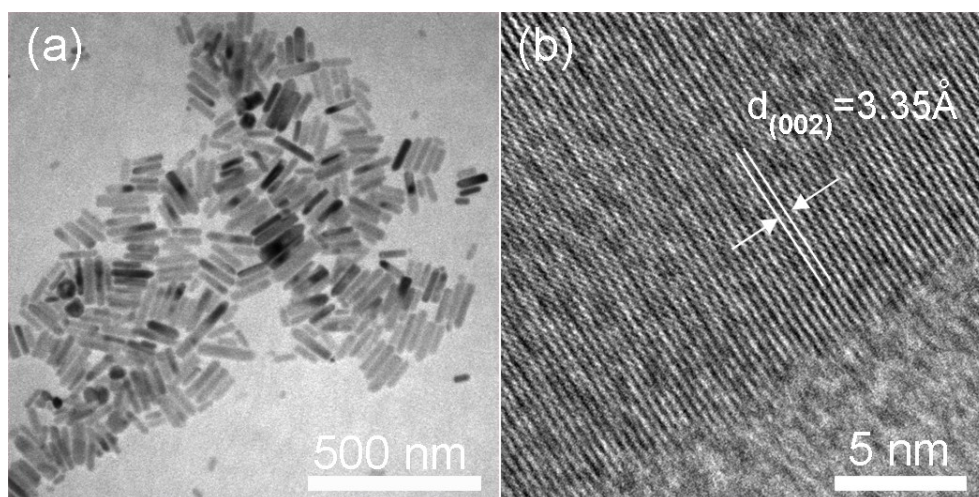

**Fig. S8** (a) TEM and (b) HRTEM images of the S dopant WZ-MnSe nanorods synthesized with S powder.

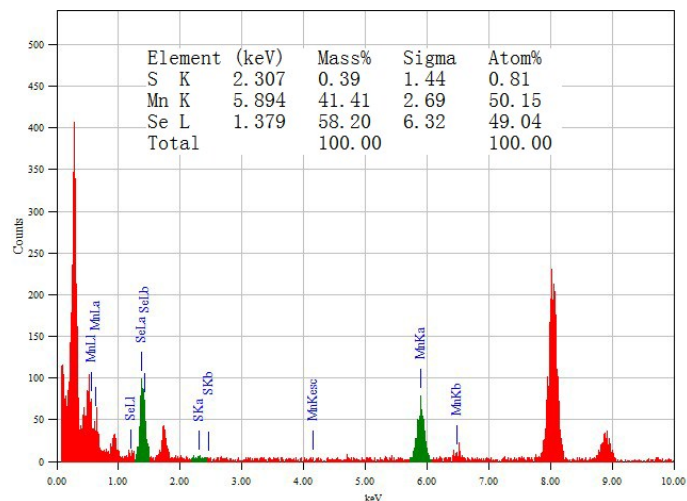

**Fig. S9** EDX spectrum of the as-prepared ~1% S dopant WZ-MnSe nanorods.

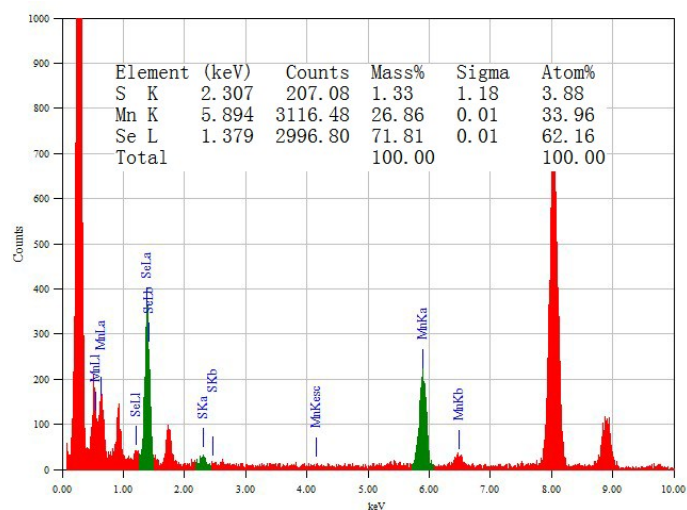

**Fig. S10** EDX spectrum of the as-prepared ~4% S dopant WZ-MnSe nanorods.

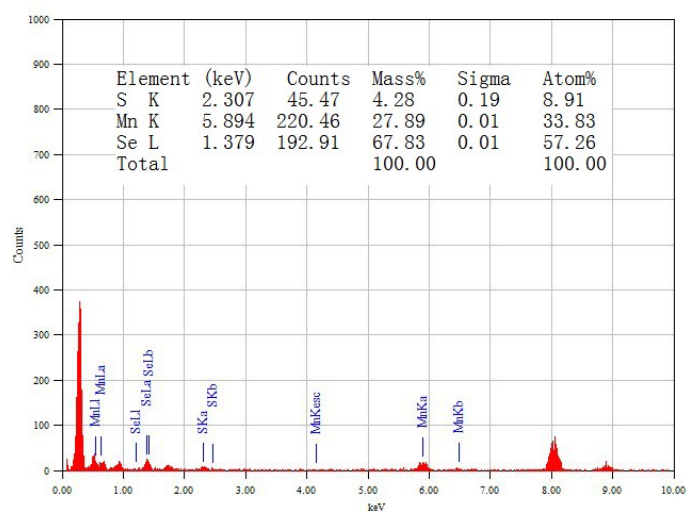

**Fig. S11** EDX spectrum of the as-prepared ~9% S dopant WZ-MnSe nanorods.

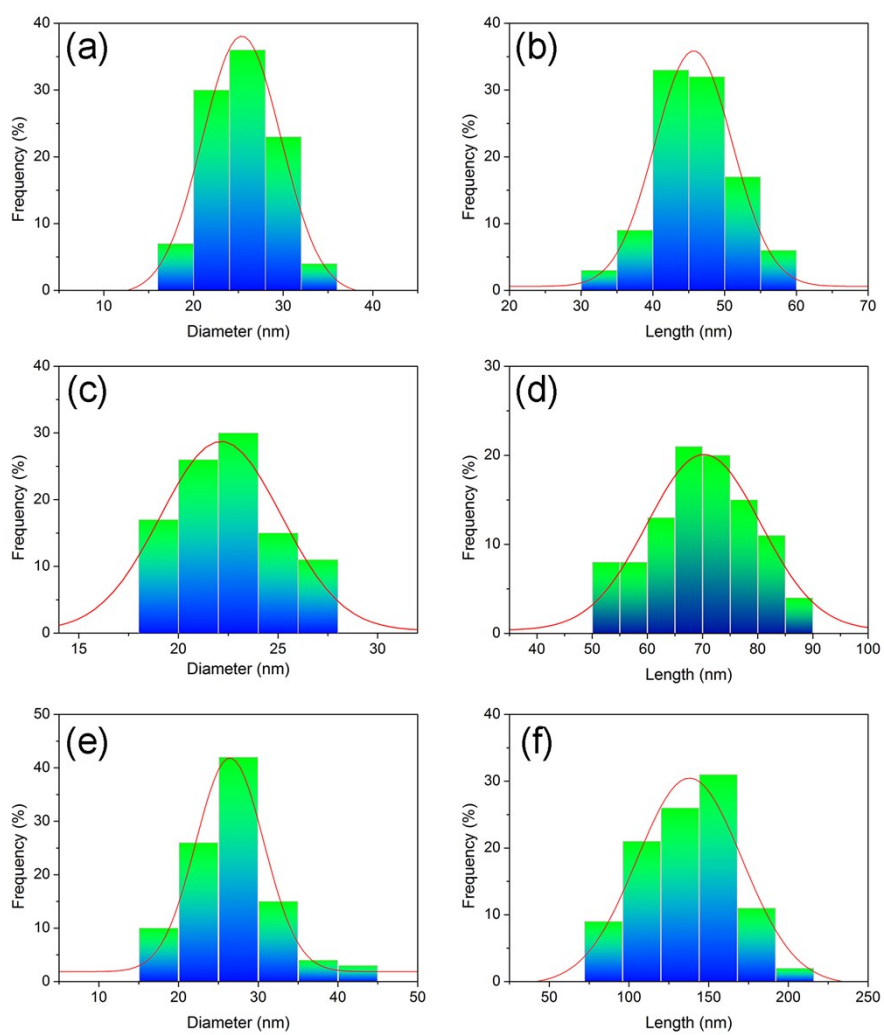

**Fig. S12** Diameter and length histograms of the as-synthesized (a, b) ~1%, (c, d) ~4% and (e, f) ~9% S dopant WZ-type MnSe nanorods.
